# Supplementary material for: Glycaemic variability underlies myocyte dysfunction and myocardial injury risk in diabetes
Source: Research Square preprint supplement (doi:10.21203/rs.3.rs-5923159/v1), 2025-03-04
Supplement: Supplementary file 1 [file 046d5fc3b139684936a06cfd.pdf]

1 **SUPPLEMENTAL FIGURES AND LEGENDS**  
2

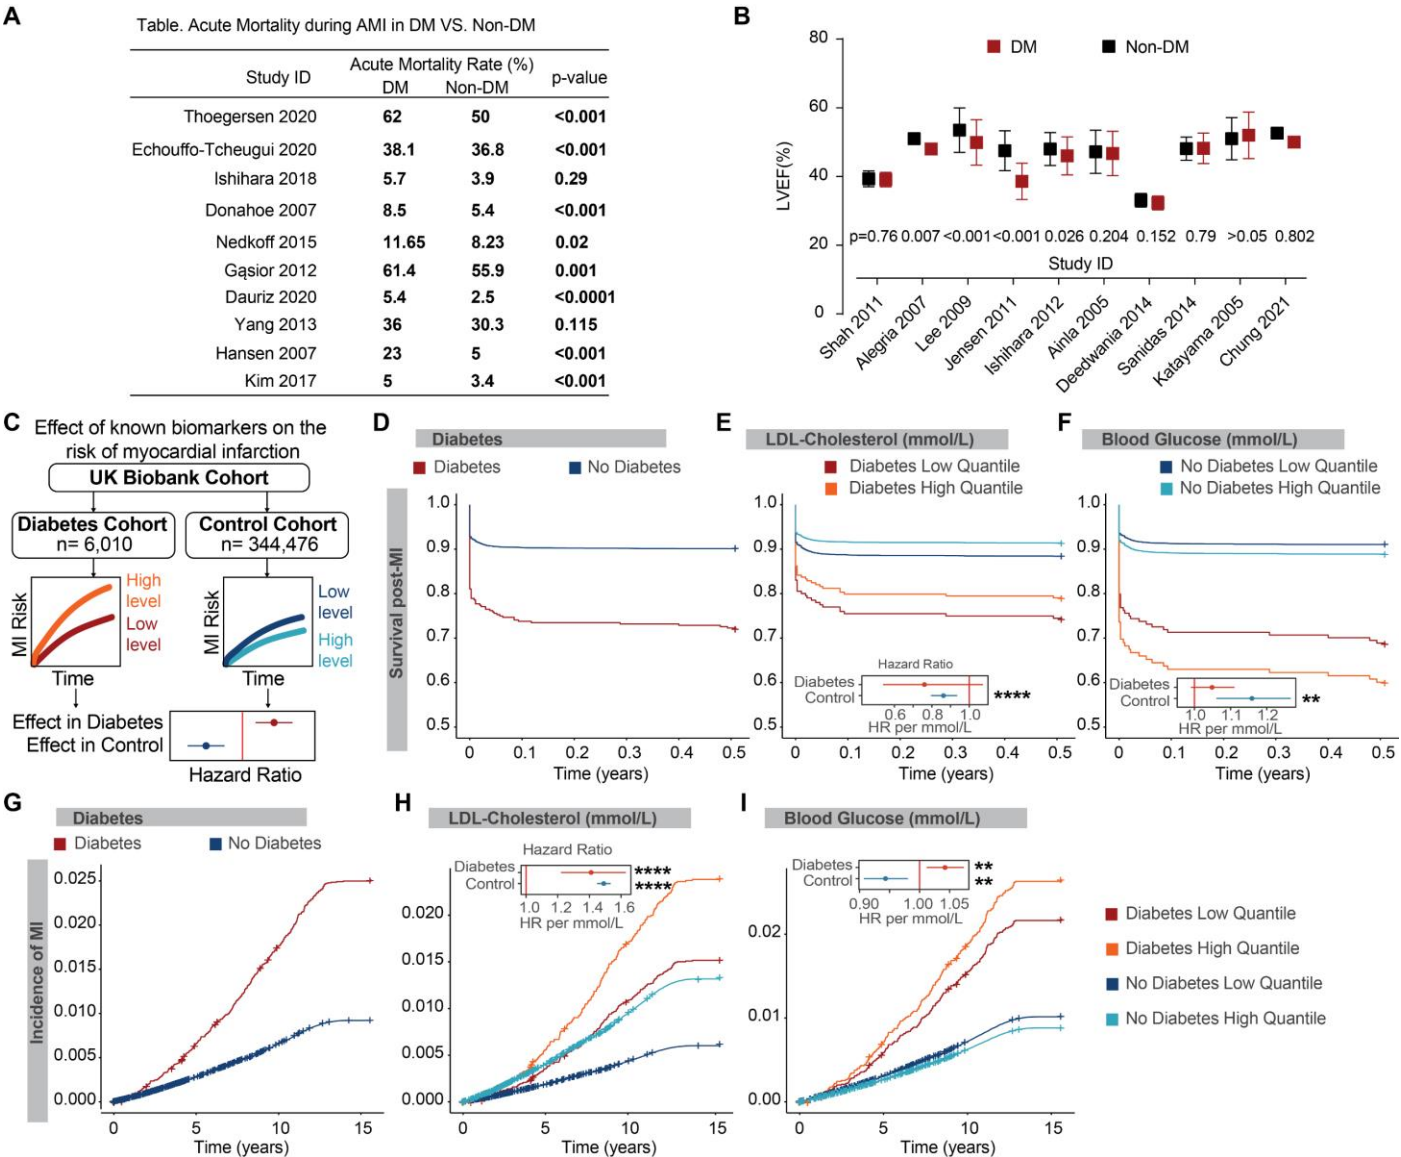

3  
4 **Supplemental Figure 1. The risk of MI and mortality from MI in DM and non-DM individuals in clinical,**  
5 **epidemiological data and in the UK Biobank Cohort. (A)** Clinical and epidemiological summaries of acute mortality  
6 rates during AMI in DM and non-DM. **(B)** Clinical and epidemiological summaries of heart dysfunction on LVEF  
7 changes post-AMI in DM and non-DM. **(C)** Summary of analyses to characterise the association of blood biomarkers  
8 in individuals with and without diabetes to the incidence and mortality of MI in the UK Biobank. **(D)** Cox proportional  
9 hazards modelling time to mortality from recruitment to the UK Biobank following MI stratified by diabetes diagnosis.  
10 **(E-F)** Effects of known MI biomarkers on time to MI mortality. Individuals stratified by diabetes diagnosis and further  
11 into the high quantile (top 30%) and bottom quantile (bottom 30%) of the biomarker levels. **(G)** Cox proportional  
12 hazards modelling time to MI incidence following MI stratified by diabetes diagnosis. **(H-I)** Effects of known MI  
13 biomarkers on time to MI incidence. Individuals stratified by diabetes diagnosis and further into the high quantile (top  
14 30%) and bottom quantile (bottom 30%) of the biomarker levels. Cox proportional hazards regression used to determine  
15 hazard ratios and statistical significance (E-F, H-I). \*P<0.05, \*\*P<0.01, \*\*\*P<0.001, \*\*\*\*P<0.0001.

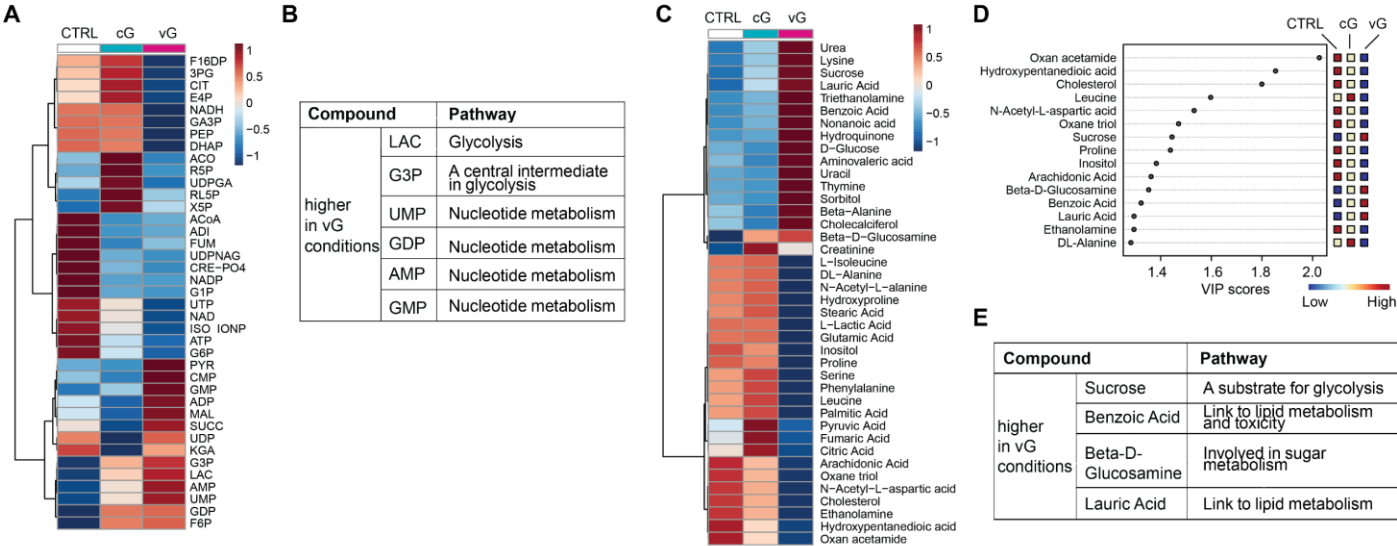

**Supplemental Figure 2. LC-MS and GC-MS metabolomics analysis of control, cG and vG cardiomyocytes. (A-B) LC-MS analysis of the differential concentration of metabolites among control, cG and vG conditions in heatmap (A), with a table of higher compounds linked to metabolic pathways (B). (C-E) GC-MS analysis of the differential concentration of metabolites among control, cG and vG conditions in heatmap (C), the relative concentrations of the corresponding metabolite in each group under study (D), and a table of higher compounds linked to metabolic pathways (E). (n=3; 3 biological replicates each with 2 technical replicates). Statistical analysis by hierarchical clustering analysis (A, C) or partial least squares - discriminant analysis (D).**
